# Supplementary material for: A direct comparison of the thermal reprocessing potential of associative and dissociative reversible bonds in thermosets
Source: Royal Society of Chemistry journal article supplement (doi:10.1039/d3lp00242j), 2024-01-01
Supplement: d3lp00242j1.pdf [file d3lp00242j1.pdf]

## **SUPPORTING INFORMATION**

### **A direct comparison of the thermal reprocessing potential of associative and dissociative reversible bonds in thermosets**

Arijana Susa\*, Willem Vogelzang, Wouter Teunissen, Karin Molenveld, Evelien Maaskant, Wouter Post

Wageningen Food and Biobased Research, Wageningen University and Research, P.O. Box 17, 6700 AA Wageningen, the Netherlands

\*[arijana.susa@wur.nl](mailto:arijana.susa@wur.nl)

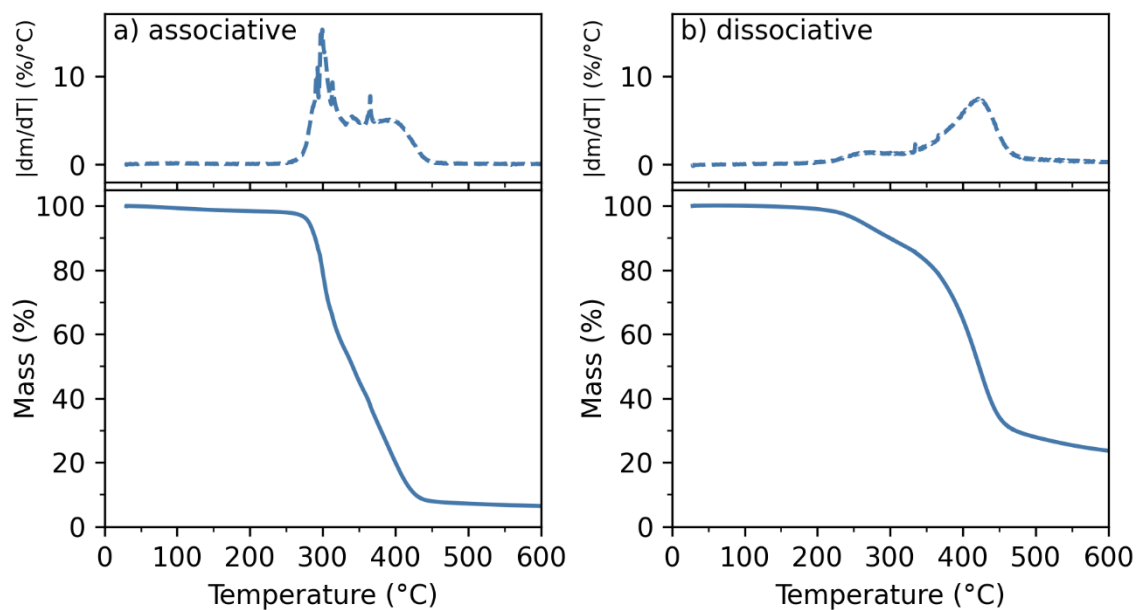

**Figure S1:** Mass loss and derivative mass loss as a function of temperature for a) the associative (vinylogous urethane) and b) the associative (Diels-Alder) thermoset. All TGA measurements were performed under a nitrogen atmosphere.

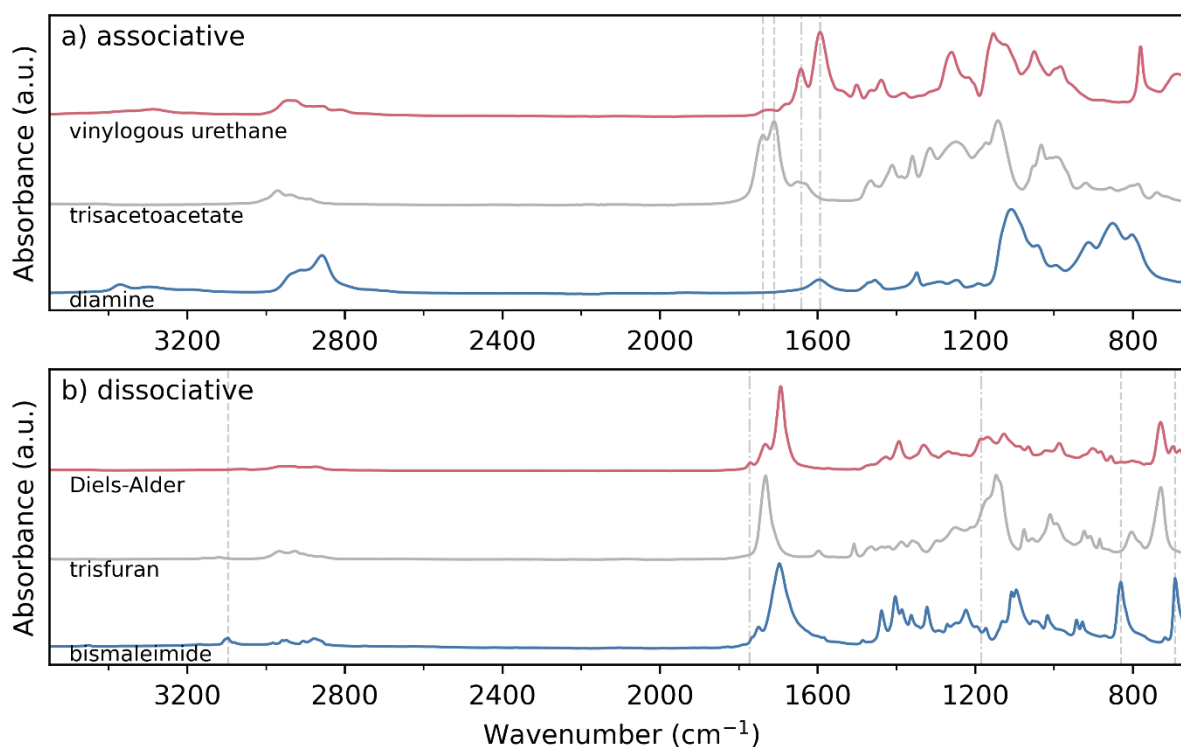

**Figure S2:** Full scale ATR-FTIR spectra of the monomers and the cured thermosets recorded at room temperature. a) Trisacetoacetate and the cured vinylogous urethane thermoset. b) Bismaleimide, trisfuran, and the cured DA thermoset

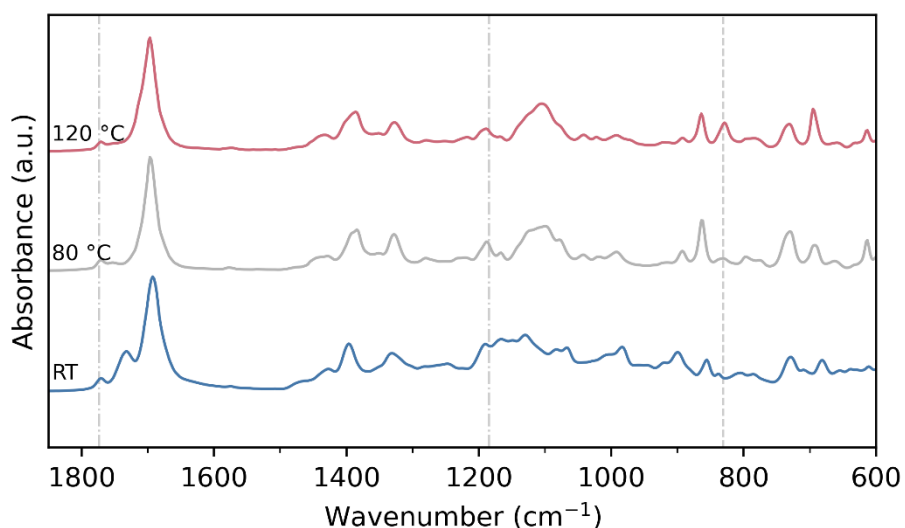

**Figure S3:** Hot stage FTIR measurements on the dissociative (Diels-Alder) thermoset at room temperature (RT), 80 °C and 120 °C. Note that the upper temperature limit of the hot stage FTIR is 120 °C, at this temperature there are still Diels-Alder adducts present (signals at 1174 and 1185  $\text{cm}^{-1}$ ).

**Table S1:** Enthalpy of the retro Diels-Alder reaction in the DA specimen for the endo and exo adduct determined from the DSC thermograms.

|                                | $\Delta H_{\text{endo}}$ (J/g) | $\Delta H_{\text{exo}}$ (J/g) |
|--------------------------------|--------------------------------|-------------------------------|
| 1 <sup>st</sup> heat treatment | 3.41                           | 3.16                          |
| 2 <sup>nd</sup> heat treatment | 1.88                           | 3.14                          |
| 3 <sup>rd</sup> heat treatment | 1.64                           | 3.24                          |
| 4 <sup>th</sup> heat treatment | 1.64                           | 3.15                          |
| 5 <sup>th</sup> heat treatment | 1.62                           | 3.17                          |

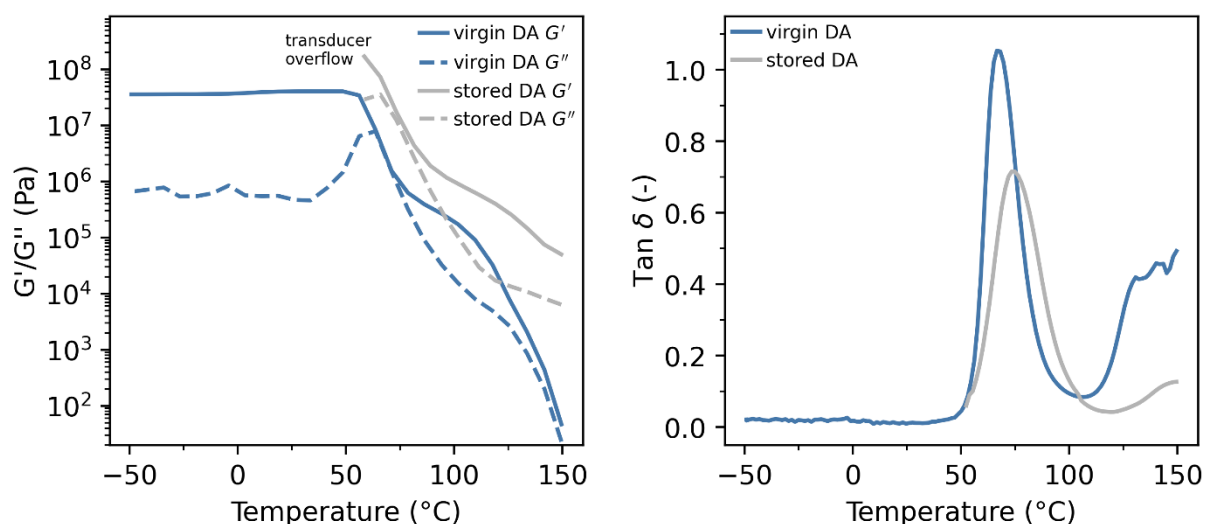

**Figure S4:** Temperature dependent dynamic behaviour of the dissociative DA polymer, in its' virgin – as synthesized – state (blue lines) and the same polymer after being stored for approximately 2 years at room temperature (grey lines). a) Storage ( $G'$ ) and loss ( $G''$ ) modulus, b)  $\tan(\delta)$ .

Figure S4 shows the comparison of the temperature dependent dynamic behavior of the dissociative DA thermoset, as a function of storage time. The sample was re-tested under the same

conditions after approximately 2 years of being stored in a dark cupboard at room temperature. While the virgin sample exhibited a clear terminal flow with a steep  $G'$  slope in the high temperature region (above 120 °C), its' aged counterpart does no longer exhibit the terminal flow in the tested temperature region. The reduced mobility after sample storage is also visible in the  $T_g$  region, as the  $\tan\delta$  maximum value is reduced by approximately 30%. A minor shift to higher  $T_g$  is observed as well. It is likely that the sample has undergone irreversible crosslinking (the formation of poly(maleimide) resulting from self-polymerization) to such an extent that prevents it to exhibit the terminal flow again up to 150 °C.

To further quantify this effect, repeated FTIR scans were obtained (Figure S5). These results do not show any significant differences as function of the storage time, which could indicate that only a small percentage of the reversible bonds has irreversibly crosslinked. It therefore seems that, based on the observed reduced mobility in Figure S4, only a small amount of crosslinks is necessary to hamper the dynamic covalent response of these specific thermoset materials.

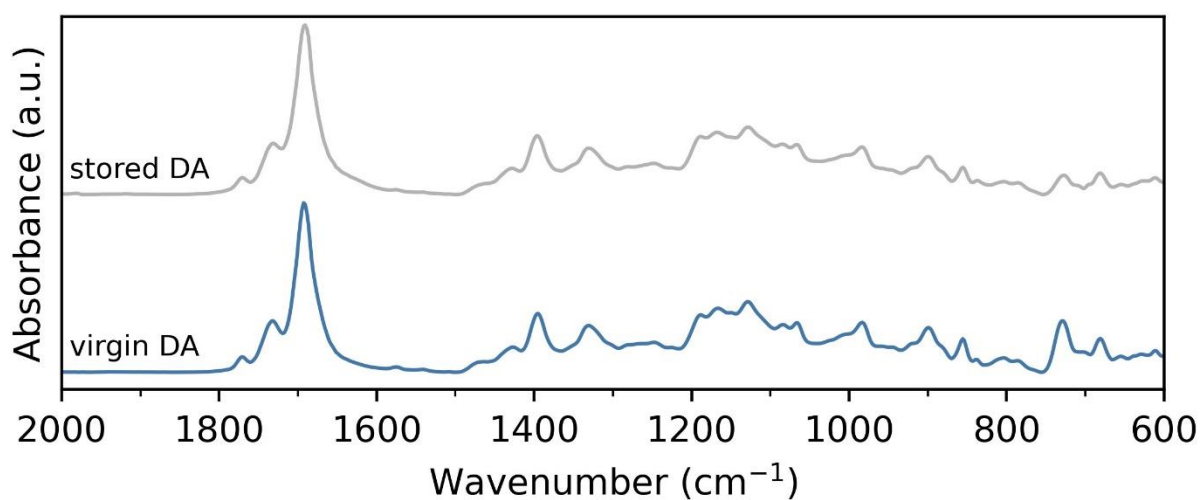

**Figure S5:** Full scale ATR-FTIR spectra of the cured dissociative (DA) thermosets recorded at room temperature, in its' virgin – as synthesized – state (blue line) and the same polymer after being stored for 2 approximately 2 years at room temperature (grey line).
